# Supplementary material for: How Discoloration of Porcine Cruor Hydrolysate Allowed the Identification of New Antifungal Peptides
Source: MDPI journal article supplement (doi:10.3390/foods11244035), 2022-12-14
Supplement: s1 [file s1]

## Supplementary Material S1

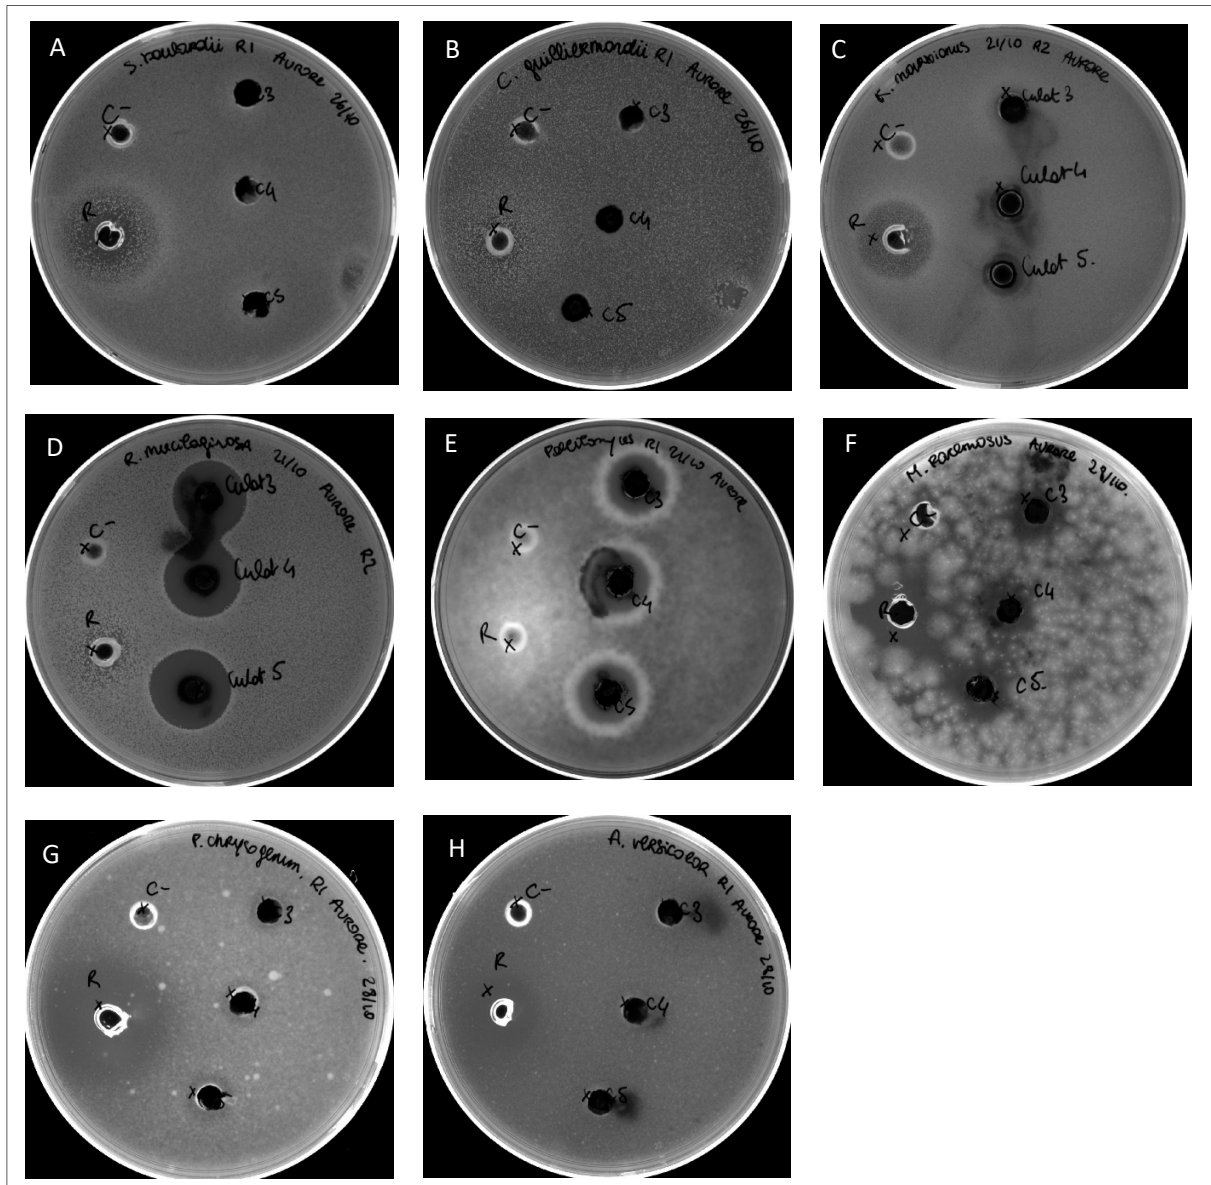

**Figure S1.** Agar diffusion test of the porcine cruor hydrolysate discoloration pellets. C3 (or C4, C5) or Culot 3 (or 4, 5): a repetition of a pellet of discoloration; *S. boulardii* (A), *C. guilliermondii* (B), *K. marxianus* (C), *R. mucilaginosa* (D), *Paecilomyces* spp. (E), *M. racemosus* (F), *P. chrysogenum* (G), *A. versicolor* (H), distilled water (C-) and Reuterin (R).

## Supplementary Material S2

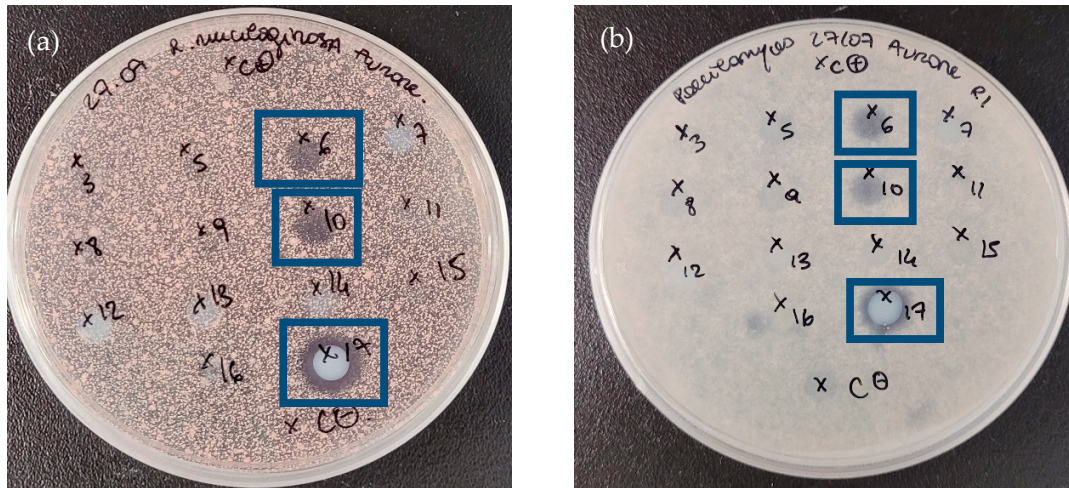

**Figure S2.** Agar diffusion test of the synthesized peptides, inhibition zones for *R. mucilaginosa* (a) and *Paecilomyces* spp. (b). Identification of the peptides are presented Table S1.

**Table S1.** Identification of peptide sequence according to their number (Figure S2)

| Peptides | Sequence (Amino acids)                              |
|----------|-----------------------------------------------------|
| 3        | FRLGNVIVVV                                          |
| 5        | GHLDDLPGALSALSDLHAHKL                               |
| 6        | PTTKTYFPFNLSHGSDQVKAHGQKVADALTKAVGHLDDLPGAL         |
| 7        | HVDPENFRLGNVIVVVVLARRLGHDENPNVQA                    |
| 8        | LAHKYH                                              |
| 9        | HVDPEN                                              |
| 10       | NALAHKYH                                            |
| 11       | HVDPENFRLGNVIVVVVL                                  |
| 12       | HVDPENFRLGNVIVVVVLARRLGHDENPNVQAA                   |
| 13       | HVDPENFRLGNVIVVVVLARRLGHDENPNVQ                     |
| 14       | DQLHVDPENFRLGNVIVVVVLARRLGHDENPNVQAA                |
| 15       | WGKVNVDVGGGEALGRLLVVYPWTQRFFESFGDLSNAD              |
| 16       | WGKVNVDVGGGEALGRLLVVYPWTQRFFESFGDLSNA               |
| 17       | HVDPENFRLGNVIVVVVLARRLGHDENPNVQAAAFQKVAVGVANALAHKYH |
